# THE AMERICAN JOURNAL OF PSYCHIATRY

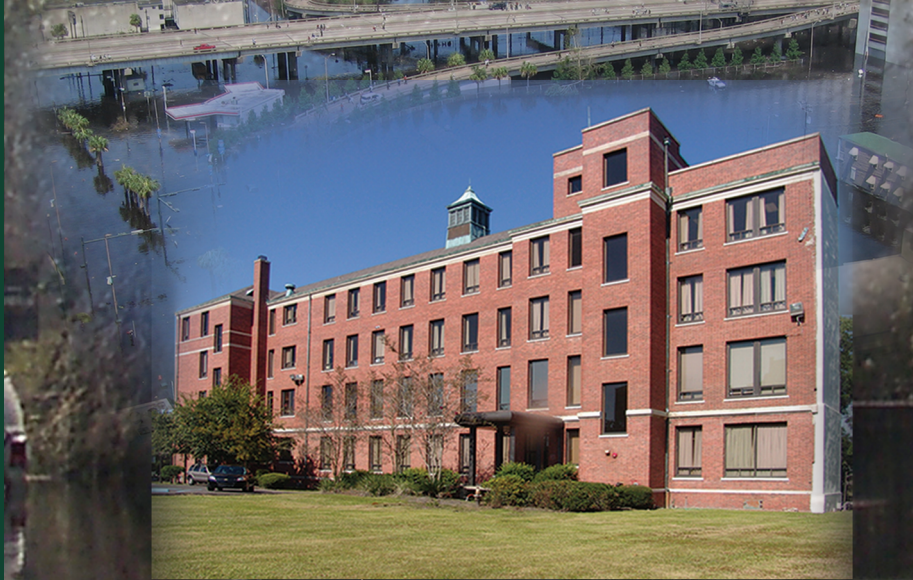

*In September 2007, the LSU Interim Hospital opened new psychiatric inpatient units in Uptown New Orleans replacing beds lost when Hurricane Katrina flooded Charity Hospital.*

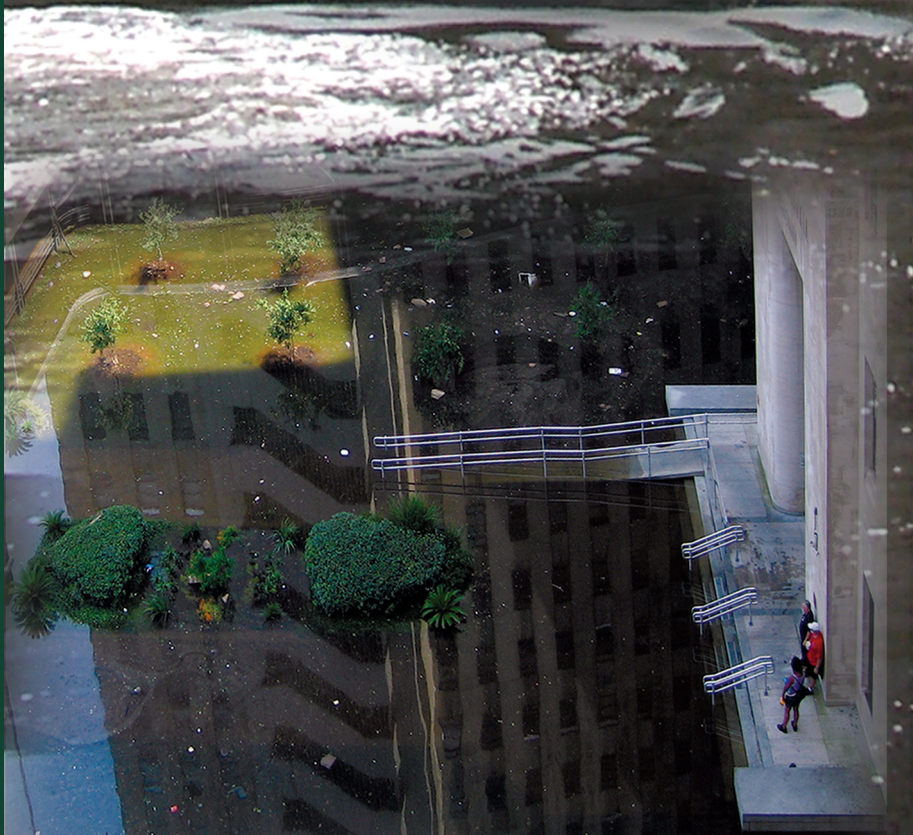

**Perimenopausal Depression**  
Barbara L. Parry 23

◀ **Restoration of Mental Health Services in New Orleans**  
Erich J. Conrad et al. 33

**Disruption of Existing Mental Health Treatments and Failure to Initiate New Treatment After Hurricane Katrina**  
Philip S. Wang et al. 34

**Galantamine for the Treatment of Cognitive Impairments in People With Schizophrenia**  
Robert W. Buchanan et al. 82

**Continuing Medical Education** 159

**January 2008**

**Volume 165 • Number 1**

Official Journal of the  
AMERICAN PSYCHIATRIC ASSOCIATION

[ajp.psychiatryonline.org](http://ajp.psychiatryonline.org)
