You now have an opportunity to earn CME credits by reading articles in *The American Journal of Psychiatry*. Three articles in this issue each comprise a short course for up to 1 hour category 1 CME credit each. The course comprises reading the article and answering three multiple-choice questions with a single correct answer. CME credit is issued only online. Readers who want credit must subscribe to the AJP Continuing Medical Education Course Program ([cme.psychiatryonline.org](http://cme.psychiatryonline.org)), select *The American Journal of Psychiatry* at that site, take the course(s) of their choosing, complete the evaluation form, and submit their answers for CME credit. In the online course, correct answers will be highlighted for the reader's reference; there is no minimum threshold score necessary for the credit. A link from the question to the correct answer in context will be highlighted in the associated article. A certificate for each course will be generated upon successful completion.

## Information for Participants

**Objectives:** After evaluating a specific journal article, participants should be able to demonstrate an increase in their knowledge of clinical medicine. Participants should be able to understand the contents of a selected research or review article and to apply the new findings to their clinical practice.

**Participants:** This program is designed for all psychiatrists in clinical practice, residents in Graduate Medical Education programs, medical students interested in psychiatry, and other physicians who wish to advance their current knowledge of clinical medicine.

**Explanation of How Physicians Can Participate and Earn Credit:** In order to earn CME credit, subscribers should read through the material presented in the article. After reading the article, complete the CME quiz online at [cme.psychiatryonline.org](http://cme.psychiatryonline.org) and submit your evaluation and study hours (up to 1 AMA PRA Category 1 Credit™).

**Credits:** The APA designates this educational activity for a maximum of 1 AMA PRA Category 1 Credit™. Physicians should only claim credit commensurate with the extent of their participation in the activity. The American Psychiatric Association (APA) is accredited by the Accreditation Council for Continuing Medical Education (ACCME) to provide continuing medical education (CME) for physicians.

**Estimated Time to Complete Course:** 1 hour

**Begin Date for Course:** January 1, 2008

**End Date for Course:** December 31, 2009

## Information on Courses

### Title: Perimenopausal Depression

**Author:** Barbara L. Parry

**Affiliation:** Department of Psychiatry, University of California, San Diego

**Disclosures:** None

**Discussion of unapproved or investigational use of products\*:** Yes

### Title: Efficacy of Sibutramine for the Treatment of Binge Eating Disorder: A Randomized Multicenter Placebo-Controlled Double-Blind Study

**Authors:** Denise E. Wilfley, Ph.D., Scott J. Crow, M.D., James I. Hudson, M.D., Sc.D., James E. Mitchell, M.D., Robert I. Berkowitz, M.D., Vicky Blakesley, M.D., Ph.D., B. Timothy Walsh, M.D.

**Affiliation:** Department of Psychiatry, Washington University School of Medicine (D.E.W.); Department of Psychiatry, University of Minnesota (S.J.C.); the Department of Psychiatry, Harvard Medical School and Biological Psychiatry Laboratory, McLean Hospital (J.I.H.); Neuropsychiatric Research Institute, Fargo, N.Dak. (J.E.M.); Department of Psychiatry, Weight and Eating Disorders Program, University of Pennsylvania School of Medicine and the Department of Child and Adolescent Psychiatry, The Children's Hospital of Philadelphia (R.I.B.); Abbott Laboratories (V.B.); New York State Psychiatric Institute, Columbia University Medical Center (B.T.W.)

**Disclosures:** Dr. Crow has received research support from Abbott Laboratories, Eli Lilly, and Ortho McNeill; he has also served as a consultant to Eli Lilly. Dr. Hudson has received research support from Eli Lilly, OrthoMcNeil, and Forest Laboratories; he has also served as a consultant to Eli Lilly and Pfizer. Dr. Blakesley is an employee of Abbott Laboratories. Dr. Walsh has received research support from Abbott Laboratories. Dr. Berkowitz has received scientific advisory panel payment and research grants from Abbott Laboratories Drs. Wilfley and Mitchell report no competing interests.

**Discussion of unapproved or investigational use of products\*:** Yes

### Title: Familial Risk Analyses of Attention Deficit Hyperactivity Disorder and Substance Use Disorders

**Authors:** Joseph Biederman, M.D., Carter R. Petty, M.A., Timothy E. Wilens, M.D., Maria G. Fraire, B.A., Caitlin A. Purcell, B.A., Eric Mick, Sc.D., Michael C. Monuteaux, Sc.D., Stephen V. Faraone, Ph.D.

**Affiliation:** Department of Pediatric Psychopharmacology, Massachusetts General Hospital  
**Disclosures:** Dr. Biederman has received research support from, has been a speaker for, or has been on the advisory boards for Shire, Eli Lilly, Pfizer, McNeil, Abbott, Neurosearch, Bristol-Myers Squibb, New River, Cephalon, Janssen, Novartis, UCB Pharma, Astra-Zeneca, Forest, Glaxo-Smith Kline, Neurosearch, the Stanley Medical Institute, the Lilly Foundation, the Prechter Foundation, NIMH, the National Institute of Child Health and Human Development, Cephalon, Novartis, and the National Institute on Drug Abuse. Dr. Wilens has received research support from, has been a speaker for, or has been on the advisory boards for Abbott, Ortho-McNeil, Eli Lilly, the National Institute on Drug Abuse, Neurosearch, Novartis, Shire, Glaxo-Smith Kline, and Pfizer. Dr. Eric Mick has received grant support from McNeil Pediatrics and NIMH and is a consultant for Janssen and Pfizer. Dr. Faraone has received research support from, has been a speaker for, or has been on the advisory boards for Eli Lilly, McNeil, Shire US, Novartis, Noven, Cephalon, NIMH, the National Institute of Child Health and Human Development, and the National Institute of Neurological Disorders and Stroke. The remaining authors report no competing interests.

**Discussion of unapproved or investigational use of products\*:** None

\* APA policy requires disclosure by CME authors of unapproved or investigational use of products discussed in CME programs. Off-label use of medications by individual physicians is permitted and common. Decisions about off-label use can be guided by scientific literature and clinical experience.

Exams are available online only at [cme.psychiatryonline.org](http://cme.psychiatryonline.org)

## INFORMATION TO PARTICIPANTS

**OBJECTIVES.** After evaluating a specific journal article published in the American Journal of Psychiatry, participants should be able to demonstrate an increase in their knowledge of clinical medicine. Participants should be able to understand the contents of a selected research or review article and to apply the new findings to their clinical practice.

**PARTICIPANTS.** This program is designed for all psychiatrists in clinical practice, residents in Graduate Medical Education programs, medical students interested in psychiatry, and other physicians who wish to advance their current knowledge of clinical medicine.

**EXPLANATION OF HOW PHYSICIANS CAN PARTICIPATE AND EARN CREDIT.** In order to earn CME credit, subscribers should read through

the material presented in the article. After reading the article, complete the CME quiz online at [cme.psychiatryonline.org](http://cme.psychiatryonline.org) and submit your evaluation and study hours (up to 1 *AMA PRA Category 1 Credit™*).

**CREDITS.** The APA designates this educational activity for a maximum of 1 *AMA PRA Category 1 Credit™*. Physicians should only claim credit commensurate with the extent of their participation in the activity. The American Psychiatric Association (APA) is accredited by the Accreditation Council for Continuing Medical Education (ACCME) to provide continuing medical education (CME) for physicians.

**Estimated Time to Complete: 1 Hour**

Begin date January 1, 2008 – End date December 31, 2010

## EXAMINATION QUESTIONS

Select the single best answer for each question below.

### Perimenopausal Depression

Barbara L. Parry

Am J Psychiatry 2008; 165:23-27

**QUESTION 1.** Which of the following statements reflects current knowledge about major depressive episodes that occur during the perimenopausal period?

- A. Depression risk during menopause is relevant only to women with pre-existing mood disorders.
- B. Epidemiologic studies do not show that perimenopausal women are at risk for depression.
- C. Perimenopausal depression is due primarily to psychosocial stressors.
- D. Reproductive endocrine changes have been linked to perimenopausal depression.

**QUESTION 2.** Which of the following reflects the role of estrogen in the management of perimenopausal depression?

- A. Estrogen replacement has been consistently shown as efficacious in monotherapy.
- B. Estrogen may adjunctively enhance the effects of antidepressant among refractory patients.
- C. Estrogen is now contraindicated in all cases due to increased breast cancer risk.
- D. Most often estrogen treatment results in worsening of sleep disturbance.

**QUESTION 3.** Factors that may predispose women to developing a depressive disorder at menopause include which of the following?

- A. History of premenstrual syndrome
- B. Previous episodes of postpartum depression
- C. Family history of a depressive disorder
- D. All of the above

## EVALUATION QUESTIONS

This evaluation form is adapted from the *MedBiquitous Journal-Based Continuing Education Guidelines 28 November 2005*.

This evaluation will appear online at the end of each CME course. Participants must complete this evaluation in order to receive credit. Select the response which best indicates your reaction to the following statements about this activity.

**STATEMENT 1.** The activity achieved its stated objectives

- 1. Strongly agree
- 2. Agree
- 3. Neutral
- 4. Disagree
- 5. Strongly disagree

**STATEMENT 2.** The activity was relevant to my practice.

- 1. Strongly agree
- 2. Agree
- 3. Neutral
- 4. Disagree
- 5. Strongly disagree

**STATEMENT 3.** I plan to change my current practice based on what I learned in the activity.

- 1. Strongly agree
- 2. Agree
- 3. Neutral
- 4. Disagree
- 5. Strongly disagree

**STATEMENT 4.** The activity validated my current practice.

- 1. Strongly agree
- 2. Agree
- 3. Neutral
- 4. Disagree
- 5. Strongly disagree

**STATEMENT 5.** The activity provided sufficient scientific evidence to support the content presented.

- 1. Strongly agree
- 2. Agree
- 3. Neutral
- 4. Disagree
- 5. Strongly disagree

**STATEMENT 6.** The activity was free of commercial bias toward a particular product or company.

- 1. Strongly agree
- 2. Agree
- 3. Neutral
- 4. Disagree
- 5. Strongly disagree

Exams are available online only at [cme.psychiatryonline.org](http://cme.psychiatryonline.org)

## INFORMATION TO PARTICIPANTS

**OBJECTIVES.** After evaluating a specific journal article published in the American Journal of Psychiatry, participants should be able to demonstrate an increase in their knowledge of clinical medicine. Participants should be able to understand the contents of a selected research or review article and to apply the new findings to their clinical practice.

**PARTICIPANTS.** This program is designed for all psychiatrists in clinical practice, residents in Graduate Medical Education programs, medical students interested in psychiatry, and other physicians who wish to advance their current knowledge of clinical medicine.

**EXPLANATION OF HOW PHYSICIANS CAN PARTICIPATE AND EARN CREDIT.** In order to earn CME credit, subscribers should read through

the material presented in the article. After reading the article, complete the CME quiz online at [cme.psychiatryonline.org](http://cme.psychiatryonline.org) and submit your evaluation and study hours (up to 1 *AMA PRA Category 1 Credit™*).

**CREDITS.** The APA designates this educational activity for a maximum of 1 *AMA PRA Category 1 Credit™*. Physicians should only claim credit commensurate with the extent of their participation in the activity. The American Psychiatric Association (APA) is accredited by the Accreditation Council for Continuing Medical Education (ACCME) to provide continuing medical education (CME) for physicians.

**Estimated Time to Complete: 1 Hour**

Begin date January 1, 2008 – End date December 31, 2010

## EXAMINATION QUESTIONS

Select the single best answer for each question below.

### Efficacy of Sibutramine for the Treatment of Binge Eating Disorder: A Randomized Multicenter Placebo-Controlled Double-Blind Study

Denise E. Wilfley et al.

Am J Psychiatry 2008; 165:51-58

**QUESTION 1.** What is the highest FDA-approved dose for sibutramine?

- A. 10 mg/day
- B. 15 mg/day
- C. 20 mg/day
- D. 25 mg/day

**QUESTION 2.** In the present study, which of the following was mentioned as a design-specific feature that may have contributed to the high placebo response?

- A. Repeated contact with the project coordinators who were also the psychometric raters
- B. The lengthy duration of the treatment
- C. Participant expectation
- D. Participants kept a diary to monitor binge eating episodes

**QUESTION 3.** This study observed which of the following outcomes in the comparison of sibutramine and placebo?

- A. Sibutramine was associated with reduced binge frequency and greater weight loss.
- B. Both sibutramine and placebo reduced binge frequency and weight to the same extent.
- C. Both sibutramine and placebo reduced binge frequency, but more weight loss occurred with placebo.
- D. Placebo treatment was associated with a greater reduction in binge frequency but increased weight.

## EVALUATION QUESTIONS

This evaluation form is adapted from the *MedBiquitous Journal-Based Continuing Education Guidelines* 28 November 2005.

This evaluation will appear online at the end of each CME course. Participants must complete this evaluation in order to receive credit. Select the response which best indicates your reaction to the following statements about this activity.

**STATEMENT 1.** The activity achieved its stated objectives

- 1. Strongly agree
- 2. Agree
- 3. Neutral
- 4. Disagree
- 5. Strongly disagree

**STATEMENT 2.** The activity was relevant to my practice.

- 1. Strongly agree
- 2. Agree
- 3. Neutral
- 4. Disagree
- 5. Strongly disagree

**STATEMENT 3.** I plan to change my current practice based on what I learned in the activity.

- 1. Strongly agree
- 2. Agree
- 3. Neutral
- 4. Disagree
- 5. Strongly disagree

**STATEMENT 4.** The activity validated my current practice.

- 1. Strongly agree
- 2. Agree
- 3. Neutral
- 4. Disagree
- 5. Strongly disagree

**STATEMENT 5.** The activity provided sufficient scientific evidence to support the content presented.

- 1. Strongly agree
- 2. Agree
- 3. Neutral
- 4. Disagree
- 5. Strongly disagree

**STATEMENT 6.** The activity was free of commercial bias toward a particular product or company.

- 1. Strongly agree
- 2. Agree
- 3. Neutral
- 4. Disagree
- 5. Strongly disagree

## Continuing Medical Education

Exams are available online only at [cme.psychiatryonline.org](http://cme.psychiatryonline.org)

### INFORMATION TO PARTICIPANTS

**OBJECTIVES.** After evaluating a specific journal article published in the American Journal of Psychiatry, participants should be able to demonstrate an increase in their knowledge of clinical medicine. Participants should be able to understand the contents of a selected research or review article and to apply the new findings to their clinical practice.

**PARTICIPANTS.** This program is designed for all psychiatrists in clinical practice, residents in Graduate Medical Education programs, medical students interested in psychiatry, and other physicians who wish to advance their current knowledge of clinical medicine.

**EXPLANATION OF HOW PHYSICIANS CAN PARTICIPATE AND EARN CREDIT.** In order to earn CME credit, subscribers should read through

the material presented in the article. After reading the article, complete the CME quiz online at [cme.psychiatryonline.org](http://cme.psychiatryonline.org) and submit your evaluation and study hours (up to 1 *AMA PRA Category 1 Credit™*).

**CREDITS.** The APA designates this educational activity for a maximum of 1 *AMA PRA Category 1 Credit™*. Physicians should only claim credit commensurate with the extent of their participation in the activity. The American Psychiatric Association (APA) is accredited by the Accreditation Council for Continuing Medical Education (ACCME) to provide continuing medical education (CME) for physicians.

**Estimated Time to Complete: 1 Hour**

Begin date January 1, 2008 – End date December 31, 2010

### EXAMINATION QUESTIONS

Select the single best answer for each question below.

#### Familial Risk Analyses of Attention Deficit Hyperactivity Disorder and Substance Use Disorders

Joseph Biederman et al.

Am J Psychiatry 2008; 165:107-115

**QUESTION 1.** The association between ADHD and alcohol dependence is most consistent with which type of transmission?

- A. Independent transmission
- B. Family subtype
- C. Variable expressivity
- D. Family dose

**QUESTION 2.** The association between ADHD and drug dependence is most consistent with which type of transmission?

- A. Independent transmission.
- B. Family subtype.
- C. Variable expressivity.
- D. Family dose.

**QUESTION 3.** The preponderant drug of dependence in adolescents with ADHD was

- A. Heroin.
- B. Marijuana.
- C. Cocaine.
- D. Inhalants.

### EVALUATION QUESTIONS

This evaluation form is adapted from the MedBiquitous Journal-Based Continuing Education Guidelines 28 November 2005.

This evaluation will appear online at the end of each CME course. Participants must complete this evaluation in order to receive credit. Select the response which best indicates your reaction to the following statements about this activity.

**STATEMENT 1.** The activity achieved its stated objectives

- 1. Strongly agree
- 2. Agree
- 3. Neutral
- 4. Disagree
- 5. Strongly disagree

**STATEMENT 2.** The activity was relevant to my practice.

- 1. Strongly agree
- 2. Agree
- 3. Neutral
- 4. Disagree
- 5. Strongly disagree

**STATEMENT 3.** I plan to change my current practice based on what I learned in the activity.

- 1. Strongly agree
- 2. Agree
- 3. Neutral
- 4. Disagree
- 5. Strongly disagree

**STATEMENT 4.** The activity validated my current practice.

- 1. Strongly agree
- 2. Agree
- 3. Neutral
- 4. Disagree
- 5. Strongly disagree

**STATEMENT 5.** The activity provided sufficient scientific evidence to support the content presented.

- 1. Strongly agree
- 2. Agree
- 3. Neutral
- 4. Disagree
- 5. Strongly disagree

**STATEMENT 6.** The activity was free of commercial bias toward a particular product or company.

- 1. Strongly agree
- 2. Agree
- 3. Neutral
- 4. Disagree
- 5. Strongly disagree

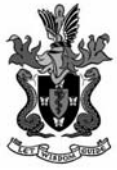

# THE BRITISH JOURNAL OF PSYCHIATRY

December 2007, VOL. 191

<http://bjp.rcpsych.org>

A20 Editorial Board

A21 Highlights of this issue

A22 Psychiatry in pictures

## EDITORIAL

471 Computer-aided psychotherapy: revolution or bubble?

I.M. Marks, K. Cavanagh, and L. Gega

## REAPPRAISAL

474 Lithium in mood disorders: increasing evidence base, declining use?

A.H. Young and J.M. Hammond

## REVIEW ARTICLE

477 Social exclusion and mental health. Conceptual and methodological review

C. Morgan, T. Burns, R. Fitzpatrick, V. Pinfold, and S. Priebe

## PAPERS

484 Schizotypal cognitions as a predictor of psychopathology in adolescents with mild intellectual impairment

E.C. Johnstone, D.G.C. Owens, P. Hoare, S. Gaur, M.D. Spencer, J. Harris, A. Stanfield, V. Moffat, N. Brearley, P. Miller, S.M. Lawrie, and W.J. Muir

493 Mental health of children and adolescents with intellectual disabilities in Britain

E. Emerson and C. Hatton

500 Mental health and quality of residential environment

H. Thomas, N. Weaver, J. Patterson, P. Jones, T. Bell, R. Playle, F. Dunstan, S. Palmer, G. Lewis, and R. Araya

506 Influence of childhood adversity on health among male UK military personnel

A.C. Iversen, N.T. Fear, E. Simonoff, L. Hull, O. Horn, N. Greenberg, M. Hotopf, R. Rona, and S. Wessely

512 Growth trajectory during early life and risk of adult schizophrenia

M.A. Perrin, H. Chen, D.E. Sandberg, D. Malaspina, and A.S. Brown

521 Cost-effectiveness of selective serotonin reuptake inhibitors and routine specialist care with and without cognitive-behavioural therapy in adolescents with major depression

S. Byford, B. Barrett, C. Roberts, P. Wilkinson, B. Dubicka, R.G. Kelvin, L. White, C. Ford, S. Breen, and I. Goodyer

528 Cost of scaling up mental healthcare in low- and middle-income countries

D. Chisholm, C. Lund, and S. Saxena

536 Cluster randomised controlled trial of training practices in reattribution for medically unexplained symptoms

R. Morriss, C. Dowrick, P. Salmon, S. Peters, G. Dunn, A. Rogers, B. Lewis, H. Charles-Jones, J. Hogg, R. Clifford, C. Rigby, and L. Gask

543 Staff and patient perspectives on unmet need and therapeutic alliance in community mental health services

U.M. Junghan, M. Leese, S. Priebe, and M. Slade

548 Postcards from the EDge: 24-month outcomes of a randomised controlled trial for hospital-treated self-poisoning

G.L. Carter, K. Clover, I.M. Whyte, A.H. Dawson, and C.D'Este

554 Efficacy of three screening instruments in the identification of autistic-spectrum disorders

T. Charman, G. Baird, E. Simonoff, T. Loucas, S. Chandler, D. Meldrum, and A. Pickles

## COLUMNS

560 Correspondence

566 One hundred years ago

567 Ten books. Chosen by Allan Beveridge

571 Book reviews

575 Books received

576 Contents of the *American Journal of Psychiatry*

577 Contents of *Advances in Psychiatric Treatment*

578 From the Editor's desk
